# Supplementary material for: Phenomenological Study of the Lived Experiences of Pregnant Women Following the Diagnosis of Fetal Abnormalities in the Second Half of Pregnancy
Source: Research Square preprint supplement (doi:10.21203/rs.3.rs-8110864/v1), 2025-12-05
Supplement: Supplementary file 1 [file 2054a201f17f00f1a7f4136c.docx]

Table 2. Main Categories, Concepts, and Themes extracted from qualitative analysis

| **Main Category** | **Concept** | **Themes** |
| --- | --- | --- |
| Cognitive and Behavioral Reactions | Cognitive reactions | Logical reasoning in acceptance, sense of responsibility, ambivalence to avoid others’ judgment, distrust in physical ability, recommendation for autonomous and rational decision-making, feeling misunderstood, sound sensitivity, lack of concentration, denial, belief in the evil eye, negative thinking, cognitive avoidance, first anxious thoughts, mental turmoil, rumination, exploring causes. |
|  | Behavioral reactions | Reduced daily activity and performance, social withdrawal to avoid questions, avoidance in facing crisis, avoiding related stimuli, isolation-seeking behaviors. |
| Motherhood Identity and Role | Perception of pregnancy | Whether pregnancy was planned or unplanned. |
|  | Maternal role confusion | Emotional conflict toward the fetus, maternal inferiority, collapse of maternal identity. |
|  | Mother–fetus connection | Hearing the heartbeat and increasing attachment, emotional transmission between mother and fetus. |
|  | Maternal identity | Sense of maternal identity, existential doubt and identity crisis, concern for older children, opposition to abortion from maternal perspective, recurring dreams about the baby, bonding with the fetus, deep love for the child, confirmation of maternal identity even under stress. |
| Beliefs, Spirituality, and Hope | Pre-crisis experiences | Clarity through past experiences, good start to pregnancy, effort for conception, initial joy, early stress, difficult pregnancy, delayed conception, occupational influence, joy over fetus’s sex, detailed pre-crisis planning. |
|  | Role of hope | Desire for positive belief despite negative conditions, hope for returning to normalcy, interpreting medical news as a ray of hope. |
|  | Religious and spiritual beliefs | Complaints toward fate and God, reliance on science over religion, maintaining hope through faith, use of religious tools for calmness, role of faith in abortion decisions, family discussions on divine justice, doubts in prayer efficacy, encouraging other women to stay hopeful, waiting for miracles, spiritual connection with the fetus, viewing the situation as divine punishment or test. |
|  | Meaning-making and attitude transformation | Finding meaning through shared experiences, gradual change of attitude toward pregnancy termination, comparison with previous hardships, hope after reading spiritual texts, redefinition of motherhood, search for meaning, emotional transformation, advice for calmness and acceptance, planning for future. |
| Social Support and Interactions | Social context | Effect of social support on anxiety reduction, stressful cultural discourse, cultural and social impact on psychological experience, social pressure for quick recovery, fear of social judgment. |
|  | Gap between received and perceived support | Receiving bad news from medical staff, feeling lonely despite support. |
|  | Expectations from healthcare team and others | Inability to understand medical jargon, reassurance through professional support, fear and doubt about medical interventions, feeling unsupported or distrustful toward staff, expectations of empathy and counseling, need for referral to psychologist. |
|  | Empathy and shared experience | Sympathy with other women who experienced similar situations. |
|  | Family and spouse | Husband’s role in spiritual support, family’s indifference, need or lack of support, marital relationship and conflicts, spouse’s guilt, family empathy, husband’s silence, advice to communicate with spouse for peace, spiritual and emotional spousal support. |
| Grief, Loss, and Sadness | Sadness and despair | Lack of motivation, crying, heavy grief, deep sorrow. |
|  | Prenatal grief | Early mourning for the fetus, despair over failed amniocentesis. |
| Anxiety, Fear, and Psychological Pressure | Fear of pregnancy and miscarriage | Fear of future pregnancy, worry about child’s future, fear of infertility, fear of recurrence, fear of miscarriage. |
|  | Decision-making and moral conflicts | Ethical dilemmas in abortion or continuation, indecisiveness, mental conflict, recommendation for patience, moral anxiety over abortion consequences, cultural and religious pressure, decision-making stress, fear of guilt. |
|  | Self-blame and guilt | Self-blame for delaying pregnancy, feeling unlucky, guilt due to unplanned pregnancy or genetic issues, denial of guilt. |
|  | Emotional and psychological reactions | Shock, disbelief, confusion, sadness, helplessness, fear, anxiety, hopelessness, loss of control, emotional numbness, depression, deep distress, ambivalence of emotions, feeling like a victim, physical and financial strain, intrusive memories, sense of emptiness. |
|  | Physical reactions | Physiological responses to medical diagnosis (e.g., tremors, palpitations). |
| Coping Styles and Emotional Regulation | Facing reality and emotional control | Overcoming denial after ultrasound, belief in emotional effects on fetus health, accepting solitude or social support for calmness, self-soothing, release from guilt through reflection, need for counseling, hope through dreams, self-care, reconciliation with body, seeking silence to reduce anxiety. |
|  | Effective coping styles | Need for emotional release, timely medical follow-up, information-seeking, peer encouragement, personal growth through crisis, emotional control, humor or distraction, gradual emotional stabilization. |
|  | Ineffective coping styles | Inability to regulate emotions, persistence of distress, avoidance or denial as coping strategies. |
