# Supplementary material for: Phenomenological Study of the Lived Experiences of Pregnant Women Following the Diagnosis of Fetal Abnormalities in the Second Half of Pregnancy
Source: Research Square preprint supplement (doi:10.21203/rs.3.rs-8110864/v1), 2025-12-05
Supplement: Supplementary file 2 [file 7e2a1bc308b79d823cf8e3a5.docx]

**Table 1. Characteristics of the participants**

| **No** | **ID** | **Age (years)** | **Residence** | **Marital Status** | **Occupation** | **Educational Level** | **Parity** | **Gestational Age at Screening (weeks)** | **Type of Anomaly** | **Previous Pregnancy Complications** | **Support System** |
| --- | --- | --- | --- | --- | --- | --- | --- | --- | --- | --- | --- |
| 1 | P1 | 30 | Borujerd | Married | Housewife | Bachelor’s | First pregnancy | 18 | Kidney failure | — | Family |
| 2 | P2 | 22 | Borujerd | Married | Housewife | Diploma | First pregnancy | 18 | Kidney adhesion | Sister-in-law’s infertility | Husband |
| 3 | P3 | 41 | Mahalat | Married | Housewife | Bachelor’s | Third pregnancy (one miscarriage, one live birth) | 19 | Brain cyst | Miscarriage in 2nd pregnancy | Husband |
| 4 | P4 | 32 | Tehran | Married | Housewife | Bachelor’s | Third pregnancy (1 live birth, 1 miscarriage) | 18 | Cardiac failure | Family miscarriage history | Spiritual beliefs |
| 5 | P5 | 27 | Maragheh | Married | Employee | Master’s | First pregnancy | 24 | Brain insufficiency | Genetic disorder in relatives | Spiritual beliefs |
| 6 | P6 | 29 | Varamin | Married | Housewife | Diploma | First pregnancy | 19 | Brain cyst & heart spot | — | Husband |
| 7 | P7 | 31 | Eslamshahr | Married | Housewife | Diploma | Second pregnancy | 18 | Growth deficiency | Short height in cousin | Husband |
| 8 | P8 | 35 | Tehran | Married | Employee | Associate | Second pregnancy | 20 | Growth defect in one twin | — | None |
| 9 | P9 | 37 | Saveh | Married | Employee | Bachelor’s | Third pregnancy (first and second miscarriages) | 21 | Limb growth anomaly | Two previous miscarriages | Husband |
| 10 | P10 | 36 | Tehran | Married | Employee | Master’s | Third pregnancy (first blighted ovum) | 20 | Spinal curvature | Blighted ovum in first pregnancy | Husband |
| 11 | P11 | 26 | Eslamshahr | Married | Housewife | Bachelor’s | First pregnancy | 20 | Right heart malformation | — | None |
| 12 | P12 | 29 | Tehran | Married | Housewife | Bachelor’s | First pregnancy | 18 | Down syndrome | — | Friends |
| 13 | P13 | 31 | Varamin | Married | Employee | Associate | Second pregnancy | 18 | Neural tube defect | Miscarriage in first pregnancy | Friends |
| 14 | P14 | 36 | Rasht | Married | Employee | Bachelor’s | First pregnancy | 19 | Nasal bone gap & brain cyst | Heart defect in niece | None |
| 15 | P15 | 38 | Ilam | Married | Housewife | Diploma | Fourth pregnancy (three miscarriages) | 24 | Growth defect & preterm birth | Miscarriages in 1st and 3rd pregnancies | Family |
| 16 | P16 | 35 | Karaj | Married | Housewife | Bachelor’s | Third pregnancy (two successful) | 20 | Trisomy 18 | Sister’s miscarriage history | Family |
| 17 | P17 | 29 | Tehran | Married | Employee | Master’s | First pregnancy | 19 | Cleft lip | Down syndrome in maternal relatives | None |
| 18 | P18 | 24 | Sari | Married | Employee | Bachelor’s | First pregnancy | 22 | Anencephaly | — | Husband |
| 19 | P19 | 26 | Tabriz | Married | Employee | Associate | Second pregnancy | 21 | Brain failure | — | Family |
| 20 | P20 | 37 | Bushehr | Married | Employee | Bachelor’s | Third pregnancy (two successful) | 20 | Structural defect | — | Family |
